# Supplementary material
Source: PubMed Central journal article supplement (PMC3423461)
Supplement: supp_47.2.227_Burnight_ODS.pdf [file supp_47.2.227_Burnight_ODS.pdf]

TRANSCRIPTIONAL TARGETING IN THE AIRWAY USING NOVEL GENE

REGULATORY ELEMENTS

Erin R. Burnight, Ph.D., Guoshun Wang, D.V.M., Ph.D., Paul B. McCray, Jr.,  
M.D., and Patrick L. Sinn, Ph.D.

**ONLINE DATA SUPPLEMENT**

## SUPPLEMENTARY MATERIALS AND METHODS

### Promoter plasmid constructs.

Promoter sequences were cloned with 5' NotI or XhoI and 3' HindIII restriction endonuclease recognition sequences. The 5' LTR from Jaagsiekte Sheep Respiratory Virus (JSRV) was PCR amplified from the pJS21-luc plasmid (1) using the forward primer AGCGGCCGCCAGTGTGATG and the reverse primer TCGCCCTTCCAAGCTTACTTAGATCGCAG. The murine *CC10* minimal promoter was a kind gift from Dr. Barry Stripp and was amplified using the forward primer AATGCGGCCGCTTGTGTGAGTG and the reverse primer AGGAAGCTTATGTGGGGTGATGTTG. Genomic regions 5' of the *BPIFA1* genes from *Canis familiaris*, *Equus ferus caballus*, *Mus musculus*, *Rattus norvegicus*, and *Homo sapiens* were aligned using the VISTA genome browser (2). One kilobase of sequence 5' and 300 bases 3' of the transcription start site (TSS) were amplified from human genomic DNA based on homology via semi-nested PCR using the 1° forward primer AAGCGGCCGCAGGTCAGGAGTTCCG and reverse primer AGAAGCTTGTTAAGGGTAGCAGAGGGGCC and the 2° forward and reverse primers AAGCGGCCGCAGGTCAGGAGTTCCG and TCAAGCTTGGATGGCTCTTACCTG, respectively. The genomic regions 5' of *WDR65* genes from *Canis familiaris*, *Equus ferus caballus*, *Mus musculus*, *Rattus norvegicus*, and *Homo sapiens* were aligned using the VISTA genome

browser. 400 bases upstream and 100 bases downstream of the TSS were amplified from human genomic DNA based on homology using the forward and reverse primers AATGCGGCCGCTCACTCCCAGGG and AATAAGCTTTGCTACCAGCTCC. Amplicons were subcloned into pCR2.1 (Invitrogen Life Technologies, Carlsbad, CA, USA). 2150 bases upstream of human *CFTR* were PCR-amplified from human leukocyte DNA and cloned in the *NheI*/*Bgl*III sites of the luciferase expression vector pGL3-Basic (Promega). Primers used to PCR amplify the human *CFTR* upstream sequence were based upon the human *CFTR* 5' end (NCBI accession # M58478); phCFTR-F CGAGCTAGCGGCATTTACTTAACTTTTCTTGTTTGCTTAAC and phCFTR-R TTAAGATCTGGTCTCTCGGGCGCTGGGGTCCCTGCTA.

To clone the dual expression constructs for *in vitro* expression analysis, *Xho*I/*Hind*III fragments from each promoter subclone were ligated to the *Xho*I/*Hind*III linearized pGL3dual vector 5' of the firefly luciferase reporter gene. To clone the FIV transgene cassette constructs, the *Not*I/*Hind*III fragments from each promoter subclone were ligated to the *Not*I/*Hind*III linearized FIV3.3MCSLuc vector (3). To clone the adenoviral-promoter-ntLacZ plasmids, the *hBP1FA1*, *hWDR65*, and *hCFTR* upstream genetic elements were first subcloned with *Mlu*I and *Bgl*III restriction sites 5' and 3', respectively, into pCR2.1 as previously described. A *Bgl*III site in the SV40 polyadenylation signal of the final Ad5ntLacZ plasmid vector was removed via site-directed mutagenesis using the QuikChange II XL Mutagenesis Kit (Agilent Technologies, Santa Clara, CA,

USA) using the primers

CTAGTCCCGCGGTGGCAAATCTGGAAGGTGCTGAGG and

CCTCAGCACCTTCCAGATTTGCCACCGCGGGGACTAG according to the manufacturer's instructions. The MluI/BglII subcloned promoter fragments were then ligated into the Ad5ntLacZ plasmid.

To clone the Ad-CFTR shuttle plasmids, the porcine cDNA was PCR amplified using the oligos AAAACTAGTAATTCAAGTCGACCTAAAGTC and

AAACTCGAGCCGGTGCCACCATGCAGAGG and subcloned into pCR2.1

(Invitrogen Life Technologies). The oligos contained 5' XhoI and 3' SpeI sites.

The XhoI/SpeI fragment was cloned into an XhoI/XbaI-digested Ad5RSVShuttle

vector. The *hBP1FA1*, *hWDR65*, and *hCFTR* upstream genetic elements were

subcloned with MluI and XhoI sites 5' and 3', respectively into pCR2.1. The

MluI/XhoI subcloned promoter fragments were then ligated into the Ad5pigCFTR plasmid.

### **Transient transfections in A549 cells.**

A549 cells (ATCC #CCL-185) were cultured in DMEM (Gibco, Carlsbad, CA,

USA) supplemented with ten percent FBS and one percent

penicillin/streptomycin. pGL3dual promoter constructs were transiently

transfected (0.4 µg) into 24-well plates of A549 cells (150,000 cells/well) using

Lipofectamine 2000 (Invitrogen Life Technologies) according to the

manufacturer's instructions. Transiently-transfected cells were harvested in 1X Passive Lysis Buffer (Promega, Madison, WI, USA) after 48 hours. Twenty  $\mu$ l lysates were assayed using the Dual-Luciferase Reporter Assay System (Promega) according to the manufacturer's instructions.

### **Viral vector production.**

Lentiviral and Adenoviral vectors were produced in the University of Iowa Gene Transfer Vector Core (4, 5). FIV packaging, transgene cassette, and envelope plasmids were co-transfected into TSA201 cells using  $\text{Ca}_2\text{PO}_3$  precipitation as previously described (4). Collected supernatants were concentrated 250:1 via overnight centrifugation and reconstituted in alpha-lactose buffer (40 mg/ml in 1X PBS). Concentrated vector was titered on HT1080s and FIV genomes were quantified using Taqman qPCR.

### **Bromodeoxyuridine (BrdU) staining**

Three mice received 7 consecutive intraperitoneal doses of BrdU (50 mg/kg/dose, 1 dose/day). Mice received 50  $\mu$ l intra-nasal doses of 2% povidone-iodine on days 1 and 4. Mice were euthanized on day 8 (4 days following the second dose of povidone-iodine and 1 day following the final dose of BRDU) and the tissues were fixed in 10% formalin. BrdU staining was conducted using a ZYMED BrdU staining kit (cat# 93-3943) and the manufacturer's instructions. A

parallel cohort of mice (n = 3) received DMSO (vehicle control) instead of polidocanol.

### **Statistics.**

All numerical data are represented as mean  $\pm$  standard error. Standard one and two sample t tests were performed using the statistical computer program R ([www.r-project.org](http://www.r-project.org)) with the lme4 package. Analysis of variance was performed using Prism software.

E1. Palmarini M, Datta S, Omid R, Murgia C, Fan H. The long terminal repeat of jaagsiekte sheep retrovirus is preferentially active in differentiated epithelial cells of the lungs. *J Virol* 2000;74:5776-5787.

E2. Frazer KA, Pachter L, Poliakov A, Rubin EM, Dubchak I. Vista: Computational tools for comparative genomics. *Nucleic Acids Res* 2004;32:W273-279.

E3. Sinn PL, Goreham-Voss JD, Arias AC, Hickey MA, Maury W, Chikkanna-Gowda CP, McCray PB, Jr. Enhanced gene expression conferred by stepwise modification of a nonprimate lentiviral vector. *Hum Gene Ther* 2007;18:1244-1252.

E4. Johnston JC, Gasmi M, Lim LE, Elder JH, Yee JK, Jolly DJ, Campbell KP, Davidson BL, Sauter SL. Minimum requirements for efficient transduction of dividing and nondividing cells by feline immunodeficiency virus vectors. *J Virol* 1999;73:4991-5000.

E5. Anderson RD, Haskell RE, Xia H, Roessler BJ, Davidson BL. A simple method for the rapid generation of recombinant adenovirus vectors. *Gene Ther* 2000;7:1034-1038.
